# Supplementary material
Source: publisher site journal article supplement (https://www.spandidos-publications.com/1416/downloadSupplementary)

Figure S1. Quantification analysis of the cell apoptosis results performed by flow cytometry in Fig.4A and B. NC, negative control; TBMS, tubeimoside I.

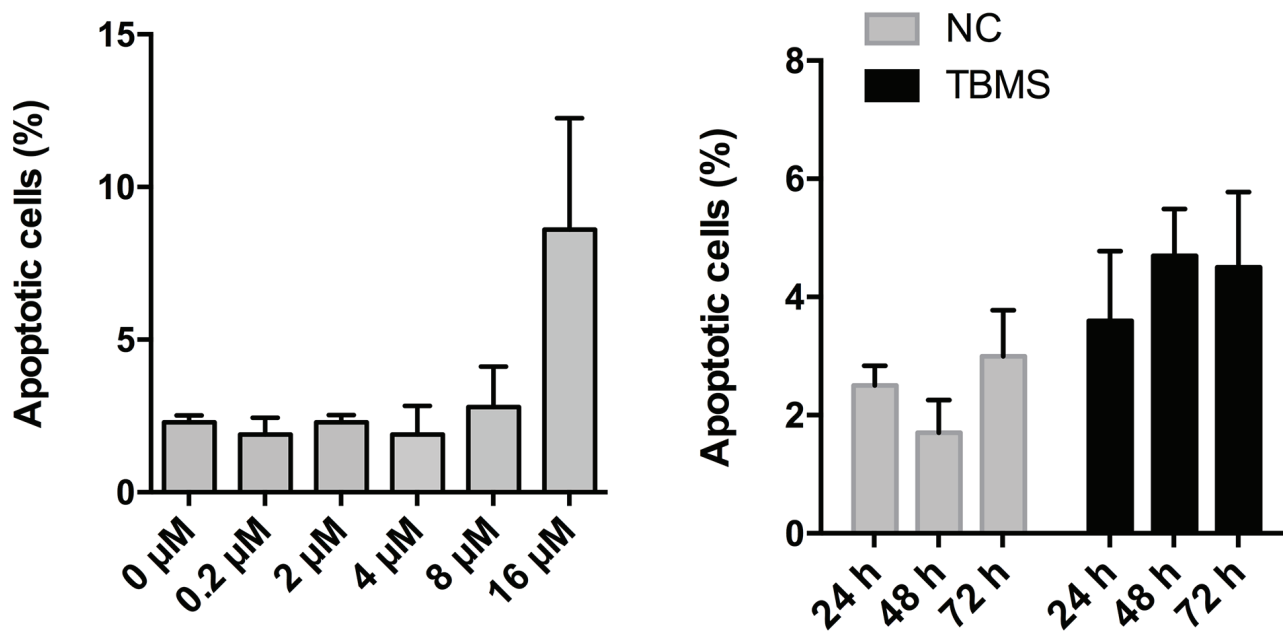

Figure S2. Doxorubicin induces apoptosis in HepG2 cells in a dose-dependent manner. (A) HepG2 cells were treated with different concentrations of doxorubicin (0, 2.5 and 5  $\mu\text{g/ml}$ ) for 24 h. The cells were then harvested and stained with Annexin V-FITC/PI, and flow cytometry used to analyze apoptosis. PI, propidium iodide. (B) Quantification analysis of the flow cytometry data.

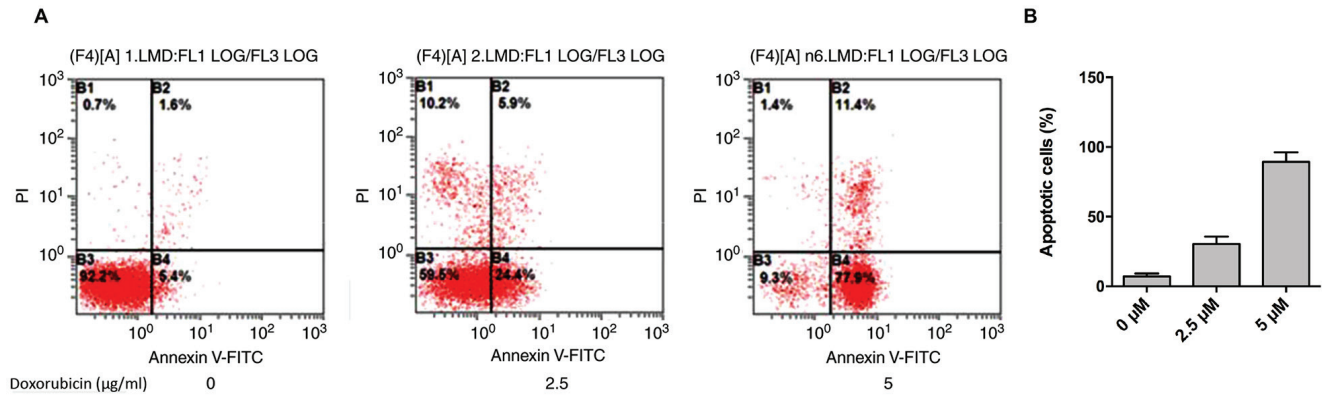

Figure S3. Reverse transcription-quantitative PCR analysis of p53 mRNA expression. HepG2 cells treated with DMSO, 8 or 16  $\mu$ M TBMS for 24 h. The data represent the mean  $\pm$  SD. \* $P$ <0.05 vs. NC. TBMS, tubeimoside I; NC, negative control.

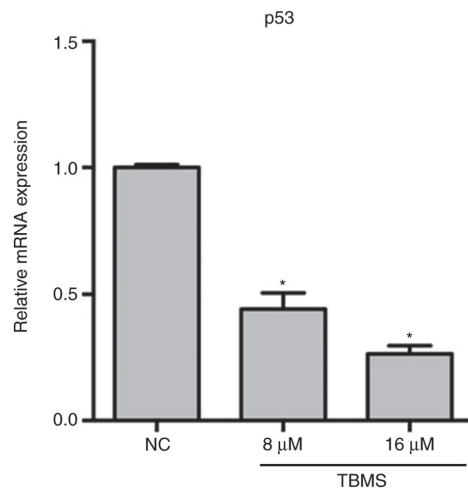

Supplement: Supplementary file 1 [file downloadSupplementary]
